# Supplementary material for: Epidemiology of respiratory viral infections in people with acute respiratory tract infections in Africa: the VARIAFRICA systematic review and meta-analysis protocol
Source: PubMed Central journal article supplement (PMC6528219; doi:10.1186/s13643-019-1037-1), 2019-05-20
Supplement: 13643_2019_1037_MOESM2_ESM.pdf [file 13643_2019_1037_MOESM2_ESM.pdf]

**Supplemental Table 1. Search strategy in PubMed**

| Search | Search terms                                                                                                                                                                                                                                                                                                                                                                                                                                                                                                                                                                                                                                                                                                                                                                                                                                                                                                                                                                                                                                                                                                                                                                                                                                                                                             |
|--------|----------------------------------------------------------------------------------------------------------------------------------------------------------------------------------------------------------------------------------------------------------------------------------------------------------------------------------------------------------------------------------------------------------------------------------------------------------------------------------------------------------------------------------------------------------------------------------------------------------------------------------------------------------------------------------------------------------------------------------------------------------------------------------------------------------------------------------------------------------------------------------------------------------------------------------------------------------------------------------------------------------------------------------------------------------------------------------------------------------------------------------------------------------------------------------------------------------------------------------------------------------------------------------------------------------|
| #1     | "HRSV" OR "RSV" OR "human respiratory syncytial virus" OR "respiratory syncytial virus" OR "HRSV A" OR "HRSV B"                                                                                                                                                                                                                                                                                                                                                                                                                                                                                                                                                                                                                                                                                                                                                                                                                                                                                                                                                                                                                                                                                                                                                                                          |
| #2     | "HMPV" OR "MPV" OR "human metapneumovirus" OR "metapneumovirus" OR "HMPV A" OR "HMPV B"                                                                                                                                                                                                                                                                                                                                                                                                                                                                                                                                                                                                                                                                                                                                                                                                                                                                                                                                                                                                                                                                                                                                                                                                                  |
| #3     | "HAdV" OR "AdV" OR "Adenovirus" OR "Adenovirus Infect*" OR "Human adenovirus" OR "human adenovirus infection" OR "HADV A" OR "HADV B" OR "HADV C" OR "HADV D" OR "HADV E" OR "HADV F" OR "HADV G"                                                                                                                                                                                                                                                                                                                                                                                                                                                                                                                                                                                                                                                                                                                                                                                                                                                                                                                                                                                                                                                                                                        |
| #4     | "HBoV" OR "BoV" OR "Bocavirus" OR "Bocavirus Infections, Human" OR "Human Bocavirus" OR "Bocavirus Infect*"                                                                                                                                                                                                                                                                                                                                                                                                                                                                                                                                                                                                                                                                                                                                                                                                                                                                                                                                                                                                                                                                                                                                                                                              |
| #5     | "HCoV" OR "CoV" OR "Coronavirus" OR "Coronavirus Infections, Human" OR "Human Coronavirus" OR "229E" OR "OC43" OR "NL63" OR "HKU1" OR "HCoV 229E" OR "HCoV OC43" OR "HCoV NL63" OR "HCoV HKU1"                                                                                                                                                                                                                                                                                                                                                                                                                                                                                                                                                                                                                                                                                                                                                                                                                                                                                                                                                                                                                                                                                                           |
| #6     | "HPIV" OR "PIV" OR "Parainfluenzavirus" OR "Parainfluenzavirus Infect*" OR "Human Parainfluenzavirus Infect*" OR "Human Parainfluenzavirus" OR "PIV1" OR "PIV2" OR "PIV3" OR "PIV4" OR "HPIV1" OR "HPIV2" OR "HPIV3" OR "HPIV4" OR "Paramyxoviridae" OR "Paramyxoviridae virus" OR "Paramyxoviridae infection"                                                                                                                                                                                                                                                                                                                                                                                                                                                                                                                                                                                                                                                                                                                                                                                                                                                                                                                                                                                           |
| #7     | "HEV" OR "EV" OR "Enterovirus" OR "Enterovirus Infections, Human" OR "Human Enterovirus"                                                                                                                                                                                                                                                                                                                                                                                                                                                                                                                                                                                                                                                                                                                                                                                                                                                                                                                                                                                                                                                                                                                                                                                                                 |
| #8     | "HRV" OR "Rhinovirus" OR "Rhinovirus Infect*" OR "Human Rhinovirus" OR "RVA" OR "RVB" OR "RVC"                                                                                                                                                                                                                                                                                                                                                                                                                                                                                                                                                                                                                                                                                                                                                                                                                                                                                                                                                                                                                                                                                                                                                                                                           |
| #9     | "Influenza virus" OR "Human Influenza" OR "Influenza" OR "Human Flu" OR "Influenza A virus" OR "Influenza B virus" OR "Influenza C virus" OR "Grippe"                                                                                                                                                                                                                                                                                                                                                                                                                                                                                                                                                                                                                                                                                                                                                                                                                                                                                                                                                                                                                                                                                                                                                    |
| #10    | "lower respiratory tract infect*" OR "LRTI" OR "acute lower respiratory infect*" OR "ALRI" OR "pneumonia" OR "community acquired pneumonia" OR "bronchiolitis" OR "severe acute respiratory infect*" OR "severe acute respiratory illness" OR "ILI" OR "Influenza Like Illness" OR "whooping cough" OR "bronchopneumonia" OR "pleurisy" OR "pleuropneumonia" OR "bronchitis" OR "respiratory infect*" OR "upper respiratory tract infect*" OR "upper respiratory infect*"                                                                                                                                                                                                                                                                                                                                                                                                                                                                                                                                                                                                                                                                                                                                                                                                                                |
| #11    | Africa* OR Algeria OR Angola OR Benin OR Botswana OR "Burkina Faso" OR Burundi OR Cameroon OR "Canary Islands" OR "Cape Verde" OR "Central African Republic" OR Chad OR Comoros OR Congo OR "Democratic Republic of Congo" OR Djibouti OR Egypt OR "Equatorial Guinea" OR Eritrea OR Ethiopia OR Gabon OR Gambia OR Ghana OR Guinea OR "Guinea Bissau" OR "Ivory Coast" OR "Cote d'Ivoire" OR Jamahiriya OR Kenya OR Lesotho OR Liberia OR Libya OR Madagascar OR Malawi OR Mali OR Mauritania OR Mauritius OR Mayotte OR Morocco OR Mozambique OR Namibia OR Niger OR Nigeria OR Principe OR Reunion OR Rwanda OR "Sao Tome" OR Senegal OR Seychelles OR "Sierra Leone" OR Somalia OR "South Africa" OR "South Sudan" OR "St Helena" OR Sudan OR Swaziland OR Tanzania OR Togo OR Tunisia OR Uganda OR "Western Sahara" OR Zaire OR Zambia OR Zimbabwe OR "Central Africa" OR "Central African" OR "West Africa" OR "West African" OR "Western Africa" OR "Western African" OR "East Africa" OR "East African" OR "Eastern Africa" OR "Eastern African" OR "North Africa" OR "North African" OR "Northern Africa" OR "Northern African" OR "South African" OR "Southern Africa" OR "Southern African" OR "sub Saharan Africa" OR "sub Saharan African" OR "sub Saharan Africa" OR "sub Saharan African" |
| #12    | #1 OR #2 OR #3 OR #4 OR #5 OR #6 OR #7 OR #8 OR #9                                                                                                                                                                                                                                                                                                                                                                                                                                                                                                                                                                                                                                                                                                                                                                                                                                                                                                                                                                                                                                                                                                                                                                                                                                                       |
| #13    | #10 AND #11 AND #12                                                                                                                                                                                                                                                                                                                                                                                                                                                                                                                                                                                                                                                                                                                                                                                                                                                                                                                                                                                                                                                                                                                                                                                                                                                                                      |
| #14    | ("2000/01/01"[Date - Publication] : "3000"[Date - Publication])                                                                                                                                                                                                                                                                                                                                                                                                                                                                                                                                                                                                                                                                                                                                                                                                                                                                                                                                                                                                                                                                                                                                                                                                                                          |
| #15    | #13 AND #14                                                                                                                                                                                                                                                                                                                                                                                                                                                                                                                                                                                                                                                                                                                                                                                                                                                                                                                                                                                                                                                                                                                                                                                                                                                                                              |
